# Supplementary material for: Homophilic Interaction Between Transmembrane-JAM-A and Soluble JAM-A Regulates Thrombo-Inflammation: Implications for Coronary Artery Disease
Source: PubMed Central journal article supplement — JACC Basic Transl Sci. 2022 May 23;7(5):445–61. doi: 10.1016/j.jacbts.2022.03.003 (PMC9156439; doi:10.1016/j.jacbts.2022.03.003), 2022-05-23
Supplement: mmc3.pdf [file mmc3.pdf]

## SUPPLEMENTAL MATERIALS

**Manuscript title: Homophilic interaction between Transmembrane-JAM-A and soluble JAM-A regulates thrombo-inflammation: Implications for Coronary Artery Disease**

**Author's names:** Dominik Rath<sup>a</sup> M.D, Vera Rapp<sup>a</sup> M.D, Jessica Schwartz<sup>a</sup> M.D, Stefan Winter<sup>b</sup> Ph.D, Frederic Emschermann<sup>a</sup> M.Sc, Daniel Arnold<sup>c</sup> M.Sc, Johannes Rheinlaender<sup>c</sup> Ph.D, Manuela Büttcher<sup>a</sup> Vet. Med., Michael Strebl<sup>d</sup> M.Sc, Michael B. Braun<sup>d</sup> M.Sc, Konstanze Altgelt<sup>a</sup> M.D, Álvaro Petersen Uribe<sup>a</sup> M.D, Christoph Schories<sup>a</sup> Cand. Med., Denis Canjuga<sup>a</sup> M.Sc, Elke Schaeffeler<sup>b</sup> Ph.D, Oliver Borst<sup>a,e</sup> M.D, Tilman E. Schäffer<sup>c</sup> Ph.D, Harald Langer<sup>a</sup> M.D, Thilo Stehle<sup>d</sup> Ph.D, Matthias Schwab<sup>b,f,g</sup> M.D, Tobias Geisler<sup>a</sup> M.D, Meinrad Gawaz<sup>a</sup> M.D, Madhumita Chatterjee<sup>a</sup> Ph.D

**Author's affiliation:** <sup>a</sup>Department of Cardiology and Angiology, University Hospital Tübingen, <sup>b</sup>Dr. Margarete Fischer-Bosch Institute of Clinical Pharmacology, Stuttgart, and University of Tübingen, <sup>c</sup>Institute of Applied Physics, <sup>d</sup>Interfaculty Institute of Biochemistry, <sup>e</sup>DFG Heisenberg Group Thrombocardiology, Department of Cardiology and Angiology, University Hospital Tübingen, <sup>f</sup>Department of Pharmacy and Biochemistry, University of Tübingen, <sup>g</sup>Department of Clinical Pharmacology, University Hospital Tübingen, Germany.

**Address for correspondence:** Madhumita Chatterjee, Dominik Rath (responsible for clinical data), Department of Cardiology and Angiology, University Hospital Tübingen. Address: Otfried Müller Straße 10, 72076, Tübingen; Germany. Phone: +49-7071-2982888, Fax: +49-7071-294474, Email: [madhumita.chatterjee@med.uni-tuebingen.de](mailto:madhumita.chatterjee@med.uni-tuebingen.de); [dominik.rath@med.uni-tuebingen.de](mailto:dominik.rath@med.uni-tuebingen.de)

**Running title:** Pro-thrombotic and thrombo-inflammatory JAM-A may affect prognosis in CAD

## 1 Materials and methods:

| Reagents, antibodies                                   | Manufacturer               | Experimental purpose                                              |
|--------------------------------------------------------|----------------------------|-------------------------------------------------------------------|
| Mouse anti-human JAM-A-FITC                            | Biolegend                  | Surface association of JAM-A on platelets by flowcytometry        |
| Goat polyclonal anti-human JAM-A unconjugated antibody | R&D systems                | Blocking transmembrane-JAM-A                                      |
| Goat control IgG                                       | Santa Cruz Biotechnologies | Control IgG                                                       |
| Human JAM-A ELISA kit                                  | Cloud clone Inc.           | Serum sJAM-A estimation                                           |
| L-selectin Duo set ELISA kit                           | R&D systems                | Serum sL-selectin estimation                                      |
| P-selectin Duo set ELISA kit                           | R&D systems                | Serum sP-selectin estimation                                      |
| Legendplex human proinflammatory chemokine panel       | Biolegend                  | Cytometric bead array (CBA) for chemokines                        |
| Legendplex human inflammation panel-1                  | Biolegend                  | CBA for cytokines                                                 |
| Anti-human CD42b-PE                                    | BD Biosciences             | Platelet marker, flowcytometry                                    |
| Anti-human CD42b-FITC                                  | Beckman Coulter            | Platelet marker, flowcytometry                                    |
| PAC-1-FITC                                             | BD Biosciences             | GPIIb/IIIa activation, flowcytometry                              |
| Anti-human CD62P-FITC                                  | Beckman Coulter            | Degranulation, flowcytometry                                      |
| GPIIb-X-488 antibody                                   | Emfret analytics           | <i>In vivo</i> platelet labelling for intravital microscopy (IVM) |
| Rabbit-anti-mouse Alexa Fluor-647 secondary antibody   | Invitrogen                 | Immunofluorescence confocal microscopy                            |
| Donkey anti-goat Alexa Fluor-568 secondary antibody    | Invitrogen                 | Immunofluorescence confocal microscopy                            |
| Trypan blue                                            | Sigma Aldrich              | Surface fluorescence quenching                                    |
| PP2                                                    | Sigma Aldrich              | Src inhibitor                                                     |
| Ly29004                                                | Cell signaling             | PI3K inhibitor                                                    |
| SH-6                                                   | Cell signaling             | Akt inhibitor                                                     |
| Gö6976                                                 | Cayman chemicals           | PKC inhibitor                                                     |
| Antibodies against phosphorylated Src, PKC, PI3K, Akt  | Cell Signaling             | Phosphoblots, immunoblots                                         |
| Anti-β3-integrin Y <sup>733</sup> phosphorylated       | Abcam                      | Phosphoblot, immunoblot                                           |
| Anti-α-tubulin, anti-β-actin, anti-GAPDH antibodies    | Cell Signaling             | Loading control for Immunoblots                                   |
| Protease-phosphatase inhibitor cocktail                | Cell Signaling             | Component of lysis buffer                                         |
| Fibrinogen                                             | Merck Millipore            | Coating adhesion surface                                          |
| Bovine serum albumin fraction V molecular grade        | Sigma Aldrich              | Control coating substance and buffer component                    |
| Horm Collagen                                          | Takeda Austria GmbH        | Coating pro-thrombotic surface                                    |
| Reagents for thromboelastography                       | Haemonetics                | Clot formation                                                    |
| Reagents for thrombinoscopy                            | Stago                      | Thrombin generation                                               |
| Anti-human CD14-APC,                                   | R&D systems                | Monocyte marker, surface expression by flowcytometry              |

|                                         |                    |                                                                 |
|-----------------------------------------|--------------------|-----------------------------------------------------------------|
| Anti-CD86-FITC, Anti-CD209-PE           | R&D systems        | Macrophage markers, surface expression by flowcytometry         |
| Anti-CD11c-APC, Anti-CD11b-FITC         | Biolegend          | Monocyte/macrophage marker, surface expression by flowcytometry |
| Anti-CD36 FITC                          | Beckman Coulter    | Surface expression by flowcytometry                             |
| Anti-CD68-FITC                          | Dako               | Surface expression by flowcytometry                             |
| Annexin V-FITC                          | Immunotools        | PS exposure                                                     |
| Tetramethylrhodamine ethyl ester (TMRE) | Invitrogen         | Mitochondrial transmembrane potential loss ( $\Delta\psi_m$ )   |
| RPMI 1640 medium                        | Gibco              | Platelet-monocyte co-incubation or co-culture                   |
| Fetal bovine serum                      | Fischer Scientific | Platelet-monocyte co-incubation or co-culture                   |
| Penicillin-Streptomycin solution        | Sigma-Aldrich      | Platelet-monocyte co-incubation or co-culture                   |
| L-Glutamine                             | Sigma-Aldrich      | Platelet-monocyte co-incubation or co-culture                   |
| Trypsin                                 | Gibco              | Harvest of monocytes                                            |
| Ficoll                                  | Merk               | Differential gradient centrifugation for PBMC isolation         |
| 0.3 $\mu$ m and 1 $\mu$ m beads         | Thermo Fisher      | Gating strategy for pMPs                                        |

**Animal experimentation:** Platelet-megakaryocyte lineage specific *F11R* deficient *Pf4-Cre<sup>+</sup>jama<sup>fl/fl</sup>* and *Pf4-Cre<sup>-</sup>jama<sup>fl/fl</sup>* littermates (*C57BL/6J-Tg(Pf4-cre)<sup>Q3Rsko/J</sup>* x *C57BL/6J-F11r<sup>tm1Dej</sup>*) were used for *ex vivo* thrombus formation assay. *C57BL/6* mice (The Jackson Laboratories, Bar Harbor, Maine, USA) were used to explore arterial (carotid) thrombosis *in vivo*, by intravital microscopy (IVM). 7-10 weeks old mice of either sex were used in the study. Randomization was done for the treatments specified and the experimenter was blinded to the treatments during the course of the experiments until final data analysis and statistical evaluation. For surgical procedures mice were anesthetized by injection of midazolam (5 mg/kg body weight), medetomidine (0.5 mg/kg body weight) and fentanyl (0.05 mg/kg body weight). Blood collection from retro-orbital plexus of mice was done under Isoflurane. All animal experimentations were conducted according to German law for the welfare of animals, ARRIVE guidelines and approved by local authorities (M18/14).

**Platelet surface-associated JAM-A by flowcytometry:** Blood from CAD patients were analyzed gating for the platelet-specific marker CD42b(GPIb $\alpha$ ). Blood collected in CPDA was diluted 1:50 with PBS and incubated with anti-human-JAM-A-FITC and anti-human CD42b/GPIb $\alpha$ -PE. Samples were incubated for 30 minutes at room temperature in the dark, fixed with 0.5% paraformaldehyde and analyzed by flowcytometry (FACS Calibur, BD Biosciences)(1). Threshold cytometer settings were ascertained using respective isotype controls.

To detect surface association of JAM-A following *in vitro* activation, platelets in platelet-rich plasma (PRP) from healthy donors was used. CPDA-anticoagulated blood was centrifuged at 190xg for 20 min to collect PRP. PRP platelets ( $10^6$ /sample) were stimulated with ADP (5, 25, 100 $\mu$ M), CRP (5 $\mu$ g/mL), and TRAP (5, 10, 25 $\mu$ M) for 30 minutes at room temperature in the presence of anti-human-JAM-A-FITC, parallel to anti-human-CD62P-FITC as platelet activation marker, fixed in 0.5% paraformaldehyde and analyzed by flowcytometry (1).

**Platelet derived microparticle (pMP) surface-associated JAM-A by flowcytometry:**

Washed platelets were either kept under resting condition or treated with 0.1U/ml of Thrombin (Roche) and incubated at 37°C under constant shaking at 800 r.p.m. for 30 min in presence of anti-human-JAM-A/JAM-1/F11R-FITC and platelet specific marker anti-human CD41-BV421. At the end of incubation period samples were fixed in 0.5% paraformaldehyde, 0.3 $\mu$ m and 1 $\mu$ m latex beads were added to the samples and acquired by flowcytometry (BD FACSLyric). Surface associated JAM-A on platelets and pMPs were evaluated by gating for platelets specific marker CD41 (**Fig. 1h**).

**Platelet isolation:** Washed platelets were isolated from healthy subjects as previously described, and used for Western Blot analysis, platelet spreading and adhesion experiments (2). Briefly, blood was collected in acid-citrate-dextrose (ACD)-buffer and centrifuged at 190xg for 20 min. Platelet-rich plasma (PRP) thus obtained was added to Tyrodes-HEPES buffer (HEPES-2.5mM; NaCl-150mM; KCl-1mM; NaHCO<sub>3</sub>-2.5mM; NaH<sub>2</sub>PO<sub>4</sub>-0.36mM; glucose-

5.5mM; BSA-1mg/ml; pH 6.5) and centrifuged at 800xg for 10 min. The platelet pellet was suspended in PBS (supplemented with CaCl<sub>2</sub>, MgCl<sub>2</sub>).

**Immunoblotting:** Detection of JAM-A in platelets, sJAM-A shed into the activated platelet supernatant (APS) was performed by Western blot analysis (2). Washed human platelets were kept under resting condition or treated with ADP-(100μM), or TRAP-(25μM). Supernatants from activated platelets were collected after 60 mins by centrifugation, and the platelet pellet was lysed at 4°C for 5 min with lysis buffer (155mM NaCl+15mM Tris+1mM EDTA+0.005 % NaN<sub>3</sub>+1 % NP-40+protease inhibitor cocktail), to perform simultaneous Western blot analysis of platelets lysates and activated platelet supernatant (APS). Samples were prepared with reducing Laemmli buffer with 10% β-mercaptoethanol, denatured at 95°C for 5 min, separated on an SDS-polyacrylamide gel and transferred onto polyvinylidene fluoride membrane (Millipore) using a SemiDry Transfer Cell System (Peqlab). An equal volume of APS were loaded per well for each experimental setting (resting, ADP/TRAP-activated) (3). For the platelet lysates, equal amounts of protein were loaded, and α-tubulin was used as loading control. Subsequently, the membrane was blocked using 5% powdered skimmed milk in PBST (PBS with 0.1 % Tween 20) and incubated with primary anti-JAM-A and α-tubulin for overnight at 4°C.

To explore the impact of sJAM-A on activatory signaling cascade, washed platelets were either kept under resting condition or treated with full-length sJAM-A-D1D2 (30μg/mL) for 5, 15, 30 minutes, lysed and processed as mentioned. Following immunoblot, membranes were incubated with respective primary antibodies against phospho-Src (1:1000), phospho-PKC (1:200), phospho-PI3K (1:500), phospho-Akt (1:200), phospho-β<sub>3</sub>-integrin (1:500), α-tubulin (1:1000), GAPDH (1:500), β-actin (1:500) for overnight at 4°C. For all immunoblot detection, corresponding secondary fluorochrome-labelled antibodies and the Odyssey infrared imaging system (LI-COR, Bad Homburg, Germany) were used (2,3).

**1 Generation of soluble human (sJAMA-D1, sJAM-AD1D2) and murine smJAM-A(D1D2)**  
**2 proteins: Generation of soluble human (sJAMA-D1, sJAM-A-D1D2) and murine smJAM-**  
**3 A(D1D2) proteins:**

4 The recombinant JAM-A proteins were produced as described in detail and published  
5 previously(4) The extracellular domains D1 (residues 27-129) or D1D2 (27-233) of JAM-A  
6 were cloned into a pGEX-4T-3 expression vector, containing an N-terminal GST affinity tag  
7 and a Thrombin cleavage site. The recombinant protein was produced in BL21(DE3) *E. coli*  
8 cells after induction with 0.2 mM IPTG at 20°C for 16 h. Cells were harvested by centrifugation,  
9 resuspended in lysis buffer (50 mM TRIs pH 7.8, 3 mM EDTA, 2 mM  $\beta$ -mercaptoethanol,  
10 1 mM PMSF, 1 % Triton X-100) and lyzed by sonication. GST-JAM-A was purified from the  
11 cleared lysate by glutathione affinity chromatography using a 5 ml GStrap HP column  
12 (Cytiva). The GST-tag was removed by proteolytic cleavage on the column with Thrombin at  
13 20°C overnight. For final polishing, a size exclusion chromatography was performed using a  
14 buffer containing 10 mM HEPES pH 7.5 and 150 mM NaCl with a Superdex 200 Increase  
15 10/300 column (Cytiva).

**16 Degranulation (CD62P surface expression),  $\alpha_{IIb}\beta_3$ -integrin activation (PAC-1 binding):**

17 PRP platelets( $10^6$ /sample) from healthy subjects (n=5) were either kept under resting condition  
18 or treated with sJAM-A (30 $\mu$ g/mL sJAM-AD1D2 or 10 $\mu$ g/mL sJAM-AD1) for 30 minutes at  
19 room temperature in the presence of anti-human CD62P-FITC or PAC-1-FITC, and  
20 subsequently incubated with platelet agonists ADP (10 $\mu$ M), TRAP (25 $\mu$ M) for 30 minutes at  
21 room temperature. Kinase inhibitors Ly29004 (PI3K-25 $\mu$ M), SH-6 (Akt-20 $\mu$ M), PP2 (Src-  
22 10 $\mu$ M), PKC inhibitor (Gö6976-1 $\mu$ M) and respective vehicle controls, anti-JAM-A-antibody  
23 (10 $\mu$ g/mL) or control IgG (10 $\mu$ g/mL) were given as a pretreatment for 15 minutes before sJAM-  
24 A. Samples were fixed in 0.5% paraformaldehyde and analyzed by flowcytometry (1).

**25 Light transmission aggregometry:** PRP platelets (200 $\times 10^3$  platelets/ $\mu$ L) were either kept  
26 untreated or pre-treated with sJAM-D1 (10 $\mu$ g/ml), sJAMA-D1D2 (30 $\mu$ g/ml) for 30 minutes at

room temperature. Aggregation was carried out in response to ADP (10 $\mu$ M) for 8-10 min at 37°C under stirring condition using AGGROLINK software (ChronoLog) (5).

**Impedance aggregometry:** 600 $\mu$ L blood (diluted 1:1 in PBS supplemented with CaCl<sub>2</sub>+MgCl<sub>2</sub>) from healthy subjects acquired in hirudinized tubes (Sarstedt) was used. Whole blood was kept untreated or pre-treated with sJAM-A (30 $\mu$ g/mL sJAM-AD1D2, or 10 $\mu$ g/mL sJAM-AD1) for 30 minutes at room temperature. Aggregation was initiated by adding TRAP (10 $\mu$ M). Where specified, blood was incubated with anti-JAM-A-antibody (10 $\mu$ g/mL) or control IgG (10 $\mu$ g/mL) for 15 minutes before adding sJAM-AD1D2 or sJAM-AD1 (6).

**Platelet spreading on fibrinogen:** Washed platelets isolated from healthy subjects were treated with 30 $\mu$ g/mL sJAM-AD1D2 or 10 $\mu$ g/mL sJAM-AD1 for 30 minutes at room temperature and then adhered over fibrinogen (100 $\mu$ g/mL) coated surface. After 15 and 30 minutes, non-adherent platelets were washed off with PBS and samples were fixed with 1% paraformaldehyde and observed under the microscope for platelets at difference stages of adhesion employing Axiovert 200, Carl Zeiss microscope. Images were acquired with AxioVision software (Carl Zeiss) and analyzed for fully spread (with lamellipodia), spread, dendritic (with filopodia) and round (resting) platelets.

**Live imaging of platelet spreading by Scanning Ion Conductance Microscopy (SICM):** SICM topography images of spreading platelets were recorded with a custom-built SICM<sup>9</sup>. Platelets were isolated from human blood as described previously and incubated with sJAM-AD1D2 (30 $\mu$ g/mL) for 30 min; thereafter allowed to adhere to culture dishes (CELLSTAR 627160, Greiner Bio-One, Kremsmünster, Austria) coated overnight with fibrinogen (100 $\mu$ g/mL). After initial contact with the culture dish, platelet spreading was imaged with typical 20s per frame until no further increase in spreading area was observed. Typical image resolution was 80x80 pixels within 10x10 $\mu$ m<sup>2</sup> scan range. Spreading rate for each platelet was derived using a custom-written analysis in Igor Pro (Wavemetrics, Lake Oswego, Oregon). Briefly, the topography images were binarized with a height threshold of 50nm. Spreading was

quantified by the final spreading area, spreading duration until 90% of the final spreading area, and initial spreading rate normalized by final spreading area determined by a linear fit up to 60% of the relative area (7,8).

**Ex vivo thrombus formation in flow chamber assay:** Blood from healthy donors (n=5) was collected in CPDA anticoagulant. Heparinized murine blood was collected from the retro-orbital plexus of *F11R* deficient *PF4-Cre<sup>+</sup>-Jama<sup>fl/fl</sup>* mice or wild type littermates *PF4-Cre<sup>-</sup>-Jama<sup>fl/fl</sup>* (n=6 mice/group) and diluted 1:3 in modified Tyrode buffer supplemented with 2mM CaCl<sub>2</sub>. Blood samples were kept untreated or treated with sJAM-A (30µg/mL sJAM-AD1D2, 10µg/mL sJAM-AD1 or 10µg/mL murine smJAM-A) for 30 min at room temperature and perfused through a transparent flow chamber (slit depth 50µm) over collagen (100µg/mL)-coated surface at 1700 s<sup>-1</sup> (human), or 1000 s<sup>-1</sup> (murine) shear rates employing Axiovert 200, Carl Zeiss microscope, optical objective 20x<sup>2</sup>. Where specified, human blood samples were pre-incubated with anti-JAM-A-antibody (10µg/mL) or respective IgG control (10µg/mL) for 15 minutes before adding sJAM-AD1D2 or sJAM-AD1. Thrombus area was analyzed offline using the captured images with AxioVision software (Carl Zeiss) (5).

**Arterial thrombosis *in vivo* and intravital microscopy (IVM):** 7-12 weeks old C57Bl6 mice (n=5 mice/group) were administered with soluble murine smJAM-A (50µg/mouse i.v.) or BSA control 30 min prior to surgical procedure under anesthesia. Circulating platelets were stained *in vivo* with GPIIb/IIIa-X488-(0.1µg/gm b.wt) administered i.v. *In vivo* thrombus formation in the carotid artery was induced by topical application of 10% FeCl<sub>3</sub> for 1 minute and monitored by IVM for 20 minutes or until complete occlusion (blood flow stopped for > 1 min) with NIS-Elements (Nikon) Microscope using a 10x objective. Digital images/video were recorded and analyzed off-line (1,2).

**Confocal microscopic analysis of platelet spread on collagen and immobilized sJAM-A:** Washed platelets were adhered over immobilized s-JAM-AD1D2 (30µg/mL) or s-JAM-AD1 (10µg/mL), or collagen (100µg/mL)-coated surface. After 1hr, non-adherent platelets were

washed off with PBS and samples were fixed with 1% paraformaldehyde, permeabilized with 0.3% Triton-X-100 and stained first for actin with Phalloidin-Alexa Fluor-488 (1:400) for 2hrs at room temperature. Then the samples were washed with washing buffer (PBS+0.3% Triton-X-100+0.1% Tween-20) and stained with mouse anti-human  $\alpha$ -tubulin (1:200) for overnight at 4°C, and counter-stained with secondary rabbit anti-mouse Alexa Fluor-647 (1:200) for 2hrs at room temperature. Samples were washed and mounted with anti-fade mounting medium (Dako). Images were acquired by confocal microscopy as mentioned (2).

**Platelet adhesion over immobilized sJAM-A:** 5-(and-6)-Carboxyfluorescein Diacetate fluorescently labelled washed human platelets were adhered over s-JAM-A- (sJAM-AD1D2-30 $\mu$ g/mL or sJAM-AD1-10 $\mu$ g/mL) coated surface (coated overnight at 4°C), collagen-(as positive control 100 $\mu$ g/mL) or BSA-(1% solution as negative control) coated surface. Platelets were pre-treated with blocking antibody against JAM-A (10 $\mu$ g/mL) or control IgG (10 $\mu$ g/mL) for 30 minutes at room temperature where specified. After 1hr of adhesion, non-adherent platelets were washed off with PBS, and fluorescence signal from adherent platelets was captured with a fluorescence plate reader (GloMax<sup>™</sup>-Promega) (9).

**Immunofluorescence confocal microscopic analysis of JAM-A expression on inflamed endothelial cells:** Confluent monolayer of HUVEC were activated with TNF $\alpha$  (50ng/mL) +IFN $\gamma$  (20ng/mL), fixed in 2% paraformaldehyde, permeabilized in 0.3% Triton-X-100, blocked with 1% BSA and stained overnight with primary anti-JAM-A (1:250) at 4°C. Samples were washed with washing buffer (PBS+0.3% Triton-X-100+0.1% Tween-20), and counter-stained with anti-goat Alexa Fluor-568 conjugated secondary antibody-(1:200) for 2hrs at room temperature. After that, samples were thoroughly washed, mounted with fluorescent mounting medium (Dako) and analyzed using Zeiss LSM 510 Meta, Axioplan 2 Imaging Confocal Laser Scanning Microscope with a 100x ocular at lower (1x) and higher magnifications (digital zoom 2x).

**Platelet adhesion on activated endothelium:** Confluent monolayer of HUVECs were treated with TNF $\alpha$  (50ng/mL) +IFN $\gamma$  (20ng/mL) for 4hrs at 37°C, 5% CO $_2$ , humidified atmosphere to trigger JAM-A surface (apical) exposure. Platelets were treated with sJAM-AD1D2 (30 $\mu$ g/mL). Where specified, anti-JAM-A-antibody (10 $\mu$ g/mL) or respective control IgG (10 $\mu$ g/mL) was employed as pre-treatment for 15 minutes before sJAM-AD1D2. Thereafter platelets were perfused over HUVECs at arterial shear rates (2000 s $^{-1}$ ). Experiments were recorded in real-time and evaluated off-line (3).

**Thrombin generation:** Thrombin generation in response to tissue factor in platelet-rich plasma (PRP) from 4 healthy subjects was measured by calibrated automated thrombinoscopy. Platelet count of PRP was adjusted with platelet poor plasma (PPP) to a final count of 150x10 $^3$ / $\mu$ l. PRP samples were pre-treated with full-length sJAM-AD1D2 (30 $\mu$ g/mL) for 30 minutes at room temperature and added to tissue factor (5pM) filled wells. By adding the fluorescent thrombin substrate (Z-Gly-Gly-Arg aminomethyl coumarin, 2.5mM), coagulation reaction was started and monitored under shaking at 37°C. Calibration was done using a thrombin calibrator. Peak thrombin generation was measured using the specified Thrombinoscope software (Stago)(5,6).

**Thromboelastography:** TEG analysis-(CK reaction) was performed to estimate the rate of blood clot formation in presence of full-length sJAM-AD1D2 (30 $\mu$ g/ml) according to manufacturer's instructions (5,6).

**Detection of platelet apoptosis by Annexin V exposure and mitochondrial membrane depolarization ( $\Delta\psi$ m) by TMRE:** PRP platelets (1x10 $^6$ /sample) from healthy donors were kept under resting condition or pre-treated with sJAM-AD1D2 (30 $\mu$ g/mL) for 30 minutes at room temperature and subsequently incubated with TRAP (25 $\mu$ M) for 1 hr at room temperature, then analyzed for apoptosis by flowcytometry as described (2).

**Isolation of peripheral blood monocytes:** Peripheral blood monocytes were isolated using leukocyte buffy coat preparations from healthy donors, by differential centrifugation through Ficoll gradient as described previously (9).

**Platelet-monocyte aggregate formation:** Monocyte and platelets were co-incubated with sJAM-AD1D2 (30µg/mL) or sJAM-AD1 (10µg/mL) for 1hr at room temperature, labelled with platelet-specific CD42b-FITC and monocyte-specific CD14-APC, fixed in 1% paraformaldehyde and analyzed by flowcytometry assessing CD14<sup>+</sup>CD42b<sup>+</sup> platelet-monocyte aggregates. Where specified, platelets were pre-incubated with anti-JAM-A-antibody (10µg/mL) or control IgG (10µg/mL) before adding sJAM-AD1D2 or sJAM-AD1(9).

**Phagocytic uptake of platelets by monocytes:** Washed platelets were treated with sJAM-AD1D2 (30µg/mL) or sJAM-AD1 (10µg/mL) for 1hr and labelled with CD42b-FITC, then added to monocytes, and incubated for 4hrs in RPMI-1640 medium ( supplemented with 10% FCS+100U/mL penicillin+100µg/mL streptomycin+2mM L-glutamine) at 37°C, 5% CO<sub>2</sub>, humidified atmosphere. Where specified, platelets were pre-incubated with anti-JAM-A-antibody (10µg/mL) or control IgG (10µg/mL) for 15 minutes. Samples were fixed in 1% paraformaldehyde and analyzed by flowcytometry. Trypan blue (10%) was used to quench surface fluorescence coming from adherent (but not phagocytosed) platelets. CD42b<sup>+</sup> monocyte population was analyzed (9).

**Monocyte-platelet co-culture:** Monocytes and platelets were co-cultured (in RPMI-1640 medium+10% FCS +100U/mL penicillin+ 100µg/mL streptomycin +2mM L-glutamine) at 37°C, 5%CO<sub>2</sub> humidified atmosphere for 10 or 15 days (for foam cells) in the presence/absence of sJAM-A-D1D2 (30µg/mL) and/or anti-JAM-A (10µg/mL) or control IgG (10µg/mL) as specified. Differentiated macrophages/foam cells (Oil-red stained) were visualized under the microscope, their numbers counted during post-acquisition image analysis using ImageJ software(9). Surface expression of CD86, CD11c, CD11b, CD209, CD68 and CD36 were evaluated by flowcytometry using respective fluorochrome conjugated antibody for each marker. Culture supernatants were evaluated for pro-inflammatory mediators using Legendplex (Biolegend) human inflammation panel 1 as per manufacturer's instructions and analyzed by flowcytometry.

# References for supplementary material:

1. Chatterjee M, Rath D, Schlotterbeck J et al. Regulation of oxidized platelet lipidome: implications for coronary artery disease. *Eur Heart J* 2017;38:1993-2005.
2. Chatterjee M, Borst O, Walker B et al. Macrophage migration inhibitory factor limits activation-induced apoptosis of platelets via CXCR7-dependent Akt signaling. *Circ Res* 2014;115:939-49.
3. Chatterjee M, Behrendt A, Schmid M et al. Platelets as a novel source of Gremlin-1: Implications for thromboinflammation. *Thromb Haemost* 2017;117:311-324.
4. Prota AE, Campbell JA, Schelling P et al. Crystal structure of human junctional adhesion molecule 1: implications for reovirus binding. *Proc Natl Acad Sci U S A* 2003;100:5366-71.
5. Munzer P, Borst O, Walker B et al. Acid sphingomyelinase regulates platelet cell membrane scrambling, secretion, and thrombus formation. *Arterioscler Thromb Vasc Biol* 2014;34:61-71.
6. Borst O, Munzer P, Alnaggar N et al. Inhibitory mechanisms of very low-dose rivaroxaban in non-ST-elevation myocardial infarction. *Blood Adv* 2018;2:715-730.
7. Seifert J, Rheinlaender J, Novak P, Korchev YE, Schaffer TE. Comparison of Atomic Force Microscopy and Scanning Ion Conductance Microscopy for Live Cell Imaging. *Langmuir* 2015;31:6807-13.
8. Rheinlaender J, Vogel S, Seifert J et al. Imaging the elastic modulus of human platelets during thrombin-induced activation using scanning ion conductance microscopy. *Thromb Haemost* 2015;113:305-11.
9. Chatterjee M, von Ungern-Sternberg SN, Seizer P et al. Platelet-derived CXCL12 regulates monocyte function, survival, differentiation into macrophages and foam cells through differential involvement of CXCR4-CXCR7. *Cell Death Dis* 2015;6:e1989.

## Supplemental Figures 1 – 3 and figure legends

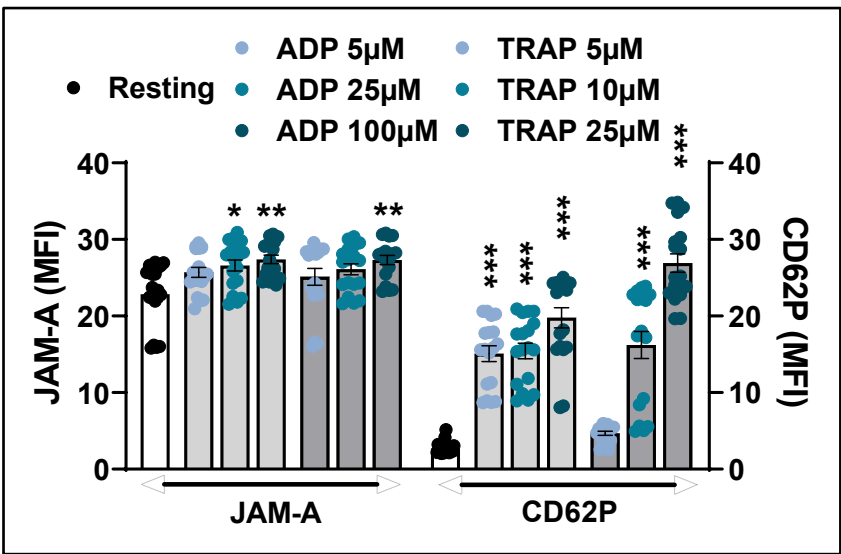

**Supplemental figure 1:** Bar diagram showing significantly enhanced platelet membrane-associated JAM-A upon activation, as compared to platelet degranulation response denoted by CD62P surface expression. \* $p < 0.05$ , \*\* $p < 0.01$ , \*\*\* $p < 0.0001$  vs resting platelets. Data are mean $\pm$ SEM of 9 independent experiments with technical replicates.

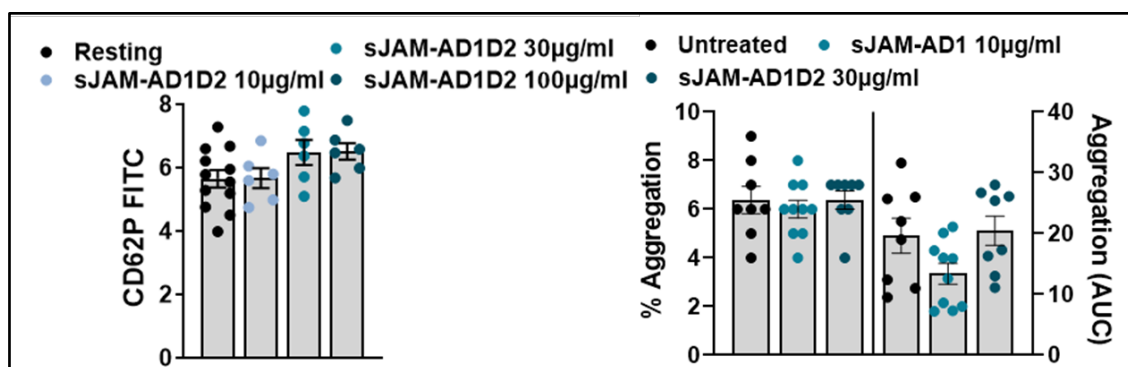

**Supplemental figure 2:** Bar diagram showing degranulation (CD62P surface expression on platelets) and aggregatory response of platelets in response to sJAM-A in absence of additional platelet agonist. Data are mean $\pm$ SEM of 5 independent experiments with technical replicates.

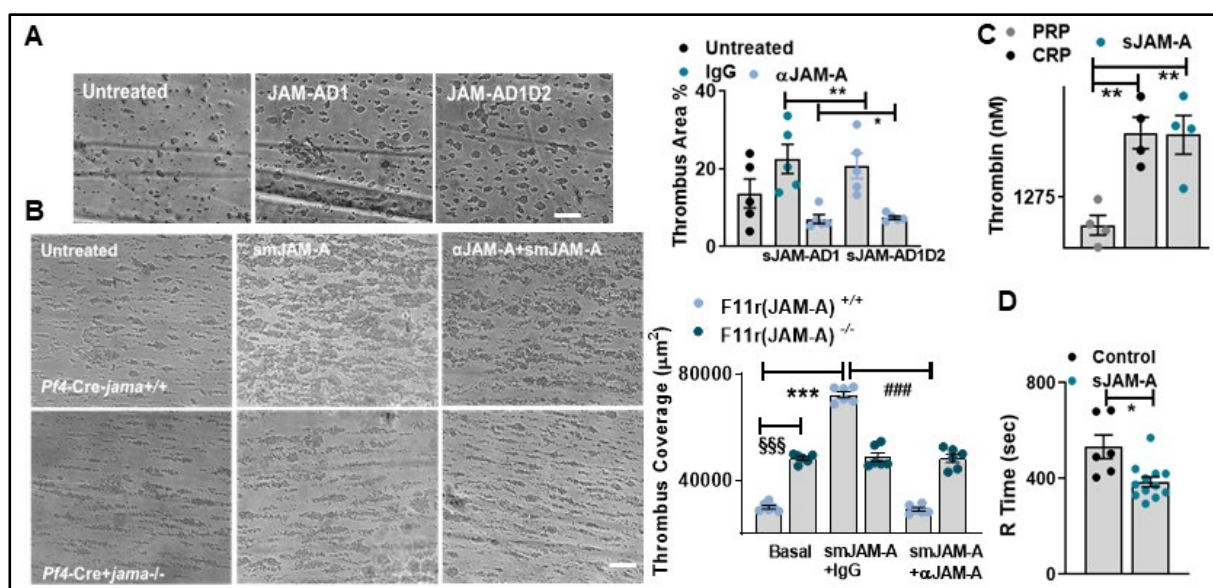

**Supplemental figure 3: sJAM-A exerts thrombotic response in a homophilic interaction with platelet transmembrane-JAM-A.** (A) Phase-contrast images of thrombus coverage (Bar=50μm), and bar diagram showing thrombus coverage  $\pm$ sJAM-AD1D2-(30μg/mL) or sJAM-AD1-(10μg/mL) and  $\pm$ anti-JAM-A-antibody(αJAM-A) (10μg/mL) or IgG control-(10μg/mL). \* $p < 0.05$ ,\*\* $p < 0.01$ . (B) Phase-contrast images of thrombus coverage (Bar=50μm),

while blood±smJAM-A-(10µg/mL) from *Pf4-Cre<sup>+</sup>Jama<sup>-/-</sup>* mice and control (*Pf4-Cre<sup>-</sup>Jama<sup>fl/fl</sup>*) littermates (n=6 mice/group) were perfused over collagen *ex vivo*. \*\*\*p<0.001;####p<0.001;§§§p<0.001. Data are mean±SEM. (C) Thrombin generation (n=4) in response to tissue factor ±sJAM-AD1D2-(30µg/mL) and CRP-(5µg/mL). \*\*p<0.01.(D) Thromboelastographic analysis of clot formation (n=3 donors) in presence and absence of sJAM-AD1D2-(30µg/mL). Data are mean±SEM.

### **Supplemental tables: 1-3**

**Supplemental table 1: Results of multivariable Cox PH regression analyses as well as Fine and Gray's 'proportional sub-distribution hazards' regression model for myocardial infarction (MI) with different treatments at hospital discharge as covariates.**

|                                                  | Cox PH model      |       | Fine-Gray model   |       |
|--------------------------------------------------|-------------------|-------|-------------------|-------|
| Variable                                         | HR (95% CI)       | p     | HR (95% CI)       | p     |
| CABG/PCI                                         | 3.98 (0.51-31.10) | 0.188 | 3.04 (0.32-29.00) | 0.330 |
| No intervention/PCI                              | 1.68 (0.63-4.49)  | 0.304 | 1.70 (0.71-4.07)  | 0.240 |
| ASA (yes/no)                                     | 1.24 (0.34-4.57)  | 0.745 | 1.25 (0.38-4.19)  | 0.710 |
| Clopidogrel (yes/no P2Y12 inhibitor)             | 2.66 (0.81-8.73)  | 0.107 | 2.60 (0.88-7.72)  | 0.085 |
| Prasugrel or ticagrelor (yes/no P2Y12 inhibitor) | 3.22 (0.94-10.99) | 0.062 | 3.18 (1.00-10.08) | 0.050 |
| Simvastatin (yes/no statin)                      | 1.20 (0.53-2.72)  | 0.663 | 1.26 (0.56-2.84)  | 0.580 |

|                                                        |                    |                                                               |                    |                                                               |
|--------------------------------------------------------|--------------------|---------------------------------------------------------------|--------------------|---------------------------------------------------------------|
| Atorvastatin (yes/no statin)                           | 1.59 (0.53-4.74)   | 0.409                                                         | 1.74 (0.59-5.15)   | 0.320                                                         |
| Other statins* (yes/no statin)                         | 0.64 (0.18-2.26)   | 0.489                                                         | 0.68 (0.20-2.34)   | 0.540                                                         |
| <b>F11R-SNP-rs2774276</b><br>(recessive genetic model) | 2.27 (1.28-4.02)   | Unadjusted-<br><b>0.005</b><br>Holm-adjusted-<br><b>0.020</b> | 2.36 (1.30-4.28)   | Unadjusted-<br><b>0.005</b><br>Holm-adjusted-<br><b>0.018</b> |
| <b>Variable</b>                                        | <b>HR (95% CI)</b> | <b>p</b>                                                      | <b>HR (95% CI)</b> | <b>p</b>                                                      |
| CABG/PCI                                               | 3.86 (0.49-30.16)  | 0.198                                                         | 2.93 (0.31-28.03)  | 0.350                                                         |
| No intervention/PCI                                    | 1.62 (0.60-4.35)   | 0.343                                                         | 1.64 (0.67-3.97)   | 0.280                                                         |
| ASA (yes/no)                                           | 1.18 (0.32-4.39)   | 0.808                                                         | 1.19 (0.35-4.00)   | 0.780                                                         |
| Clopidogrel (yes/no P2Y12 inhibitor)                   | 2.63 (0.80-8.65)   | 0.111                                                         | 2.58 (0.86-7.68)   | 0.090                                                         |
| Prasugrel or ticagrelor (yes/no P2Y12 inhibitor)       | 3.27 (0.96-11.15)  | 0.058                                                         | 3.23 (1.02-10.26)  | <b>0.047</b>                                                  |
| Simvastatin (yes/no statin)                            | 1.21 (0.53-2.75)   | 0.646                                                         | 1.27 (0.57-2.87)   | 0.560                                                         |
| Atorvastatin (yes/no statin)                           | 1.50 (0.50-4.49)   | 0.470                                                         | 1.64 (0.55-4.92)   | 0.380                                                         |
| Other statins* (yes/no statin)                         | 0.65 (0.18-2.29)   | 0.502                                                         | 0.69 (0.20-2.40)   | 0.560                                                         |
| <b>F11R-SNP- rs790056</b><br>(recessive genetic model) | 2.15 (1.11-4.18)   | Unadjusted-<br><b>0.023</b><br>Holm-adjusted-<br>0.069        | 2.23 (1.13-4.39)   | Unadjusted-<br><b>0.021</b><br>Holm-adjusted-<br>0.063        |

| Variable                                                | HR (95% CI)       | p                                                                 | HR (95% CI)       | p                                                                 |
|---------------------------------------------------------|-------------------|-------------------------------------------------------------------|-------------------|-------------------------------------------------------------------|
| Intervention (yes/no) <sup>†</sup>                      | 0.82 (0.27-2.48)  | 0.721                                                             | 0.79 (0.25-2.44)  | 0.680                                                             |
| ASA (yes/no)                                            | 5.11 (0.69-37.66) | 0.109                                                             | 5.08 (0.70-34.64) | 0.110                                                             |
| Clopidogrel (yes/no P2Y12 inhibitor)                    | 0.63 (0.17-2.30)  | 0.486                                                             | 0.67 (0.18-2.47)  | 0.540                                                             |
| Prasugrel or ticagrelor (yes/no P2Y12 inhibitor)        | 0.65 (0.17-2.46)  | 0.522                                                             | 0.68 (0.18-2.62)  | 0.570                                                             |
| Simvastatin (yes/no statin)                             | 1.83 (0.57-5.86)  | 0.307                                                             | 1.71 (0.54-5.41)  | 0.360                                                             |
| Atorvastatin (yes/no statin)                            | 1.38 (0.35-5.49)  | 0.644                                                             | 1.35 (0.34-5.29)  | 0.670                                                             |
| Other statins* (yes/no statin)                          | 0.84 (0.14-5.10)  | 0.846                                                             | 0.80 (0.13-4.86)  | 0.810                                                             |
| <b>sJAM-A ≤median vs &gt;median (median =1.71ng/mL)</b> | 3.21 (1.71-6.00)  | Unadjusted-<br><b>&lt;0.001</b><br>Holm-adjusted-<br><b>0.001</b> | 3.09 (1.65-5.78)  | Unadjusted-<br><b>&lt;0.001</b><br>Holm-adjusted-<br><b>0.002</b> |

\*Rosuvastatin, Pravastatin, Fluvastatin, Lovastatin

<sup>†</sup> Only n=2 CABG cases. CABG and PCI cases were therefore merged and compared to patients w/o intervention.

**Supplemental Table 2: Correlations between serum sJAM-A levels and inflammatory mediators in CAD patients.**

| Inflammatory mediators or markers | Spearman correlation coefficient (rho) | p value      | n= CAD patients with serum sJAM-A values |
|-----------------------------------|----------------------------------------|--------------|------------------------------------------|
| hsCRP                             | 0.175                                  | <b>0.003</b> | n=282 of 401                             |

|                    |       |              |                                 |
|--------------------|-------|--------------|---------------------------------|
| Serum sL-selectin  | 0.138 | <b>0.097</b> | n=152 (matched with SNP cohort) |
| Serum sP-selectin  | 0.143 | <b>0.086</b> | n=152 (matched with SNP cohort) |
| Serum MCP-1 (CCL2) | 0.200 | <b>0.007</b> | n=152 (matched with SNP cohort) |
| Serum TARC (CCL17) | 0.245 | <b>0.002</b> | n=152 (matched with SNP cohort) |

1

2 **Supplemental table 3: Baseline characteristics of non-CAD patients**

3 **(sJAM-A median = 1.52ng/mL)**

| <b>Baseline characteristics</b> | <b>sJAM-A ≤ median (n=36)</b> | <b>sJAM-A &gt; median (n=36)</b> | <b>p</b>     |
|---------------------------------|-------------------------------|----------------------------------|--------------|
| Age (mean ± SD)                 | 70.0 (±14.3)                  | 61.8 (±15.4)                     | <b>0.021</b> |
| Gender (male %)                 | 23 (63.9 %)                   | 28 (77.8 %)                      | 0.195        |
| LVEF% (mean ± SD)               | 48.5 (±12.6)                  | 43.3 (±16.3)                     | 0.172        |
| <b>Risk factors</b>             |                               |                                  |              |
| Arterial hypertension (%)       | 27 (75.0 %)                   | 24 (66.7 %)                      | 0.437        |
| Hyperlipidemia (%)              | 9 (25.0 %)                    | 8 (22.2 %)                       | 0.781        |
| Diabetes mellitus type II (%)   | 10 (27.8 %)                   | 9 (25.0 %)                       | 0.789        |
| Smoking (%)                     | 8 (22.2 %)                    | 12 (33.3 %)                      | 0.327        |
| <b>Medication on admission</b>  |                               |                                  |              |
| ASA (%)                         | 13 (36.1 %)                   | 7 (19.4 %)                       | 0.173        |
| Clopidogrel (%)                 | 0 (0.0 %)                     | 1 (2.8 %)                        | 0.292        |
| Prasugrel (%)                   | 0 (0.0 %)                     | 1 (2.8 %)                        | 0.292        |
| Ticagrelor (%)                  | 0 (0.0 %)                     | 0 (0.0 %)                        | -            |

|                              |             |             |              |
|------------------------------|-------------|-------------|--------------|
| ACE inhibitors (%)           | 15 (41.7 %) | 13 (36.1 %) | 0.853        |
| AT-1 antagonists (%)         | 7 (19.4 %)  | 5 (13.9 %)  | 0.641        |
| Calcium channel blockers (%) | 12 (33.3 %) | 5 (13.9 %)  | 0.080        |
| Beta blockers (%)            | 18 (50.0 %) | 20 (55.6 %) | 0.361        |
| Statins (%)                  | 16 (44.4 %) | 6 (16.7% %) | <b>0.019</b> |

1

2 **Supplemental video files 1-2 (video file and legends)**

3 **Supplemental movie 1 (video file):** IVM analysis of thrombus formation in FeCl<sub>3</sub> injured  
4 carotid artery; mice administered with control BSA (50µg/mouse i.v.).

5 **Supplemental movie 2 (video file):** IVM analysis of thrombus formation in FeCl<sub>3</sub> injured  
6 carotid artery; mice administered with smJAM-A (50µg/mouse i.v.).

7
